# Supplementary material for: NIR-accelerated cascade reaction for degradation of organophosphorus compounds by Au/PTE/ZIF-8: cooperative effect and mechanism
Source: Royal Society of Chemistry journal article supplement (doi:10.1039/d4cy00311j), 2024-01-01
Supplement: d4cy00311j1.pdf [file d4cy00311j1.pdf]

## Supporting information

### **NIR-accelerated cascade reaction for degradation of organophosphorus compounds by Au/PTE/ZIF-8: Cooperative effect and mechanism**

Fang Wang,<sup>ab</sup> Yi Ouyang,<sup>b</sup> Pengfei Zhou,<sup>bc</sup> Yan Zhang,<sup>b</sup> Renjun Gao,<sup>\*a</sup> Bekir Engin Eser,<sup>\*b</sup> and Zheng Guo<sup>\*b</sup>

<sup>a</sup> Key Laboratory for Molecular Enzymology and Engineering, The Ministry of Education, School of Life Science, Jilin University, Changchun 130021, China

<sup>b</sup> Department of Biological and Chemical Engineering, Faculty of Technical Science, Aarhus University, 8000 Aarhus, Denmark

<sup>c</sup> Sericultural & Agri-Food Research Institute, Guangdong Academy of Agricultural Sciences, Key Laboratory of Functional Foods, Ministry of Agriculture and Rural Affairs, Guangdong Key Laboratory of Agricultural Product Processing, Guangzhou, 510610, China

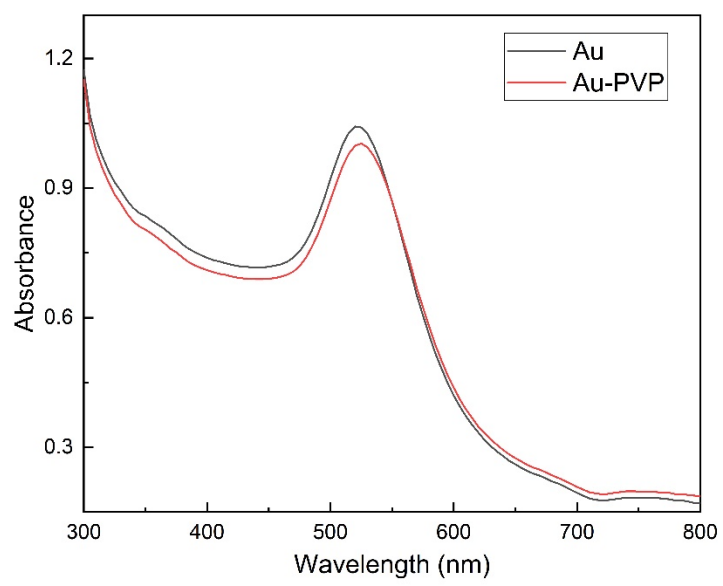

**Fig. S1** UV-VIS absorption spectra of Au and Au-PVP

## Text S1 Calculation of photothermal conversion efficiency

The temperature change constant can be written as

$$\theta = \frac{T_t - T_0}{T_{max} - T_0}$$

where  $T_t$  is the temperature at time  $t$ ,  $T_0$  is the initial solution temperature, and  $T_{max}$  is the maximum temperature that the solution can reach under NIR.

To evaluate the heat transfer time constant ( $\tau_s$ ),

$$\tau_s = -\frac{t}{\ln\theta} \quad (2)$$

And the heat transfer coefficient is given as

$$h = \frac{\sum_i m_i C_{p,i}}{S\tau_s} \quad (3)$$

where  $m$  is the mass of the water,  $C_p$  is the heat capacity of the water,  $S$  is the surface area of the container, and  $m$  is the mass of the water.

The heat released from light absorbed by a container containing pure water ( $Q_0$ ) can be determined by recording the temperature decay profile to the ambient temperature

$$Q_0 = \frac{cm\Delta T}{t} \quad (4)$$

where  $\Delta T$  is defined as the temperature change of the solution after turning off the laser,  $t$  is the heat

dissipation time of pure water.

Therefore, the photothermal conversion efficiency can be calculated by

$$\eta = \frac{hS(T_{max} - T_0) - Q_0}{P(1 - 10^{-A_{808}})} \quad (5)$$

where  $P$  is the laser power (2.5 W),  $A_{808}$  is the UV absorbance of the solution at 808nm

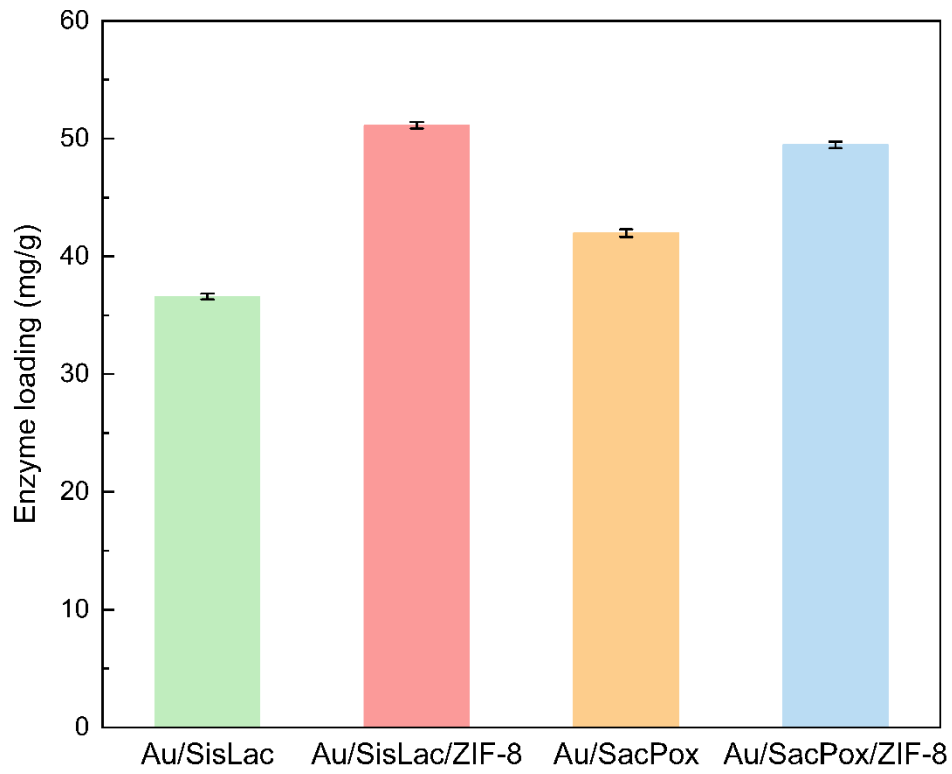

**Fig. S2** The loaded enzymes SisLac and SanPox on different nanomaterials, AuNPs and Au/ZIF-8

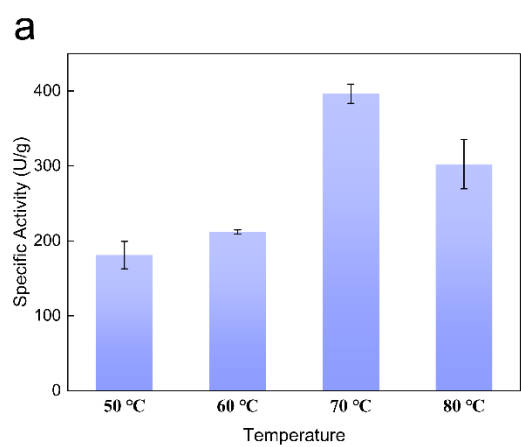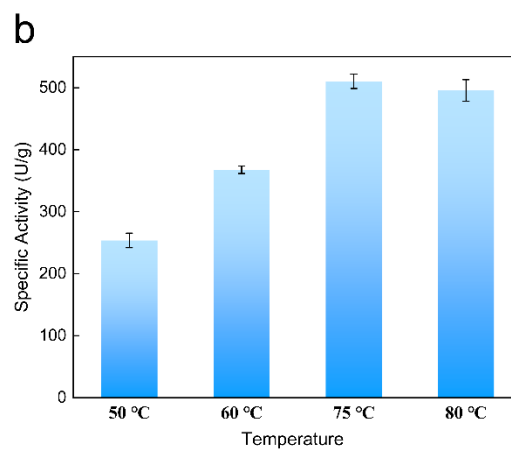

**Fig. S3** (a,b) The specific activity of Au/SisLac/ZIF-8 and Au/SacPox/ZIF-8 at different temperatures

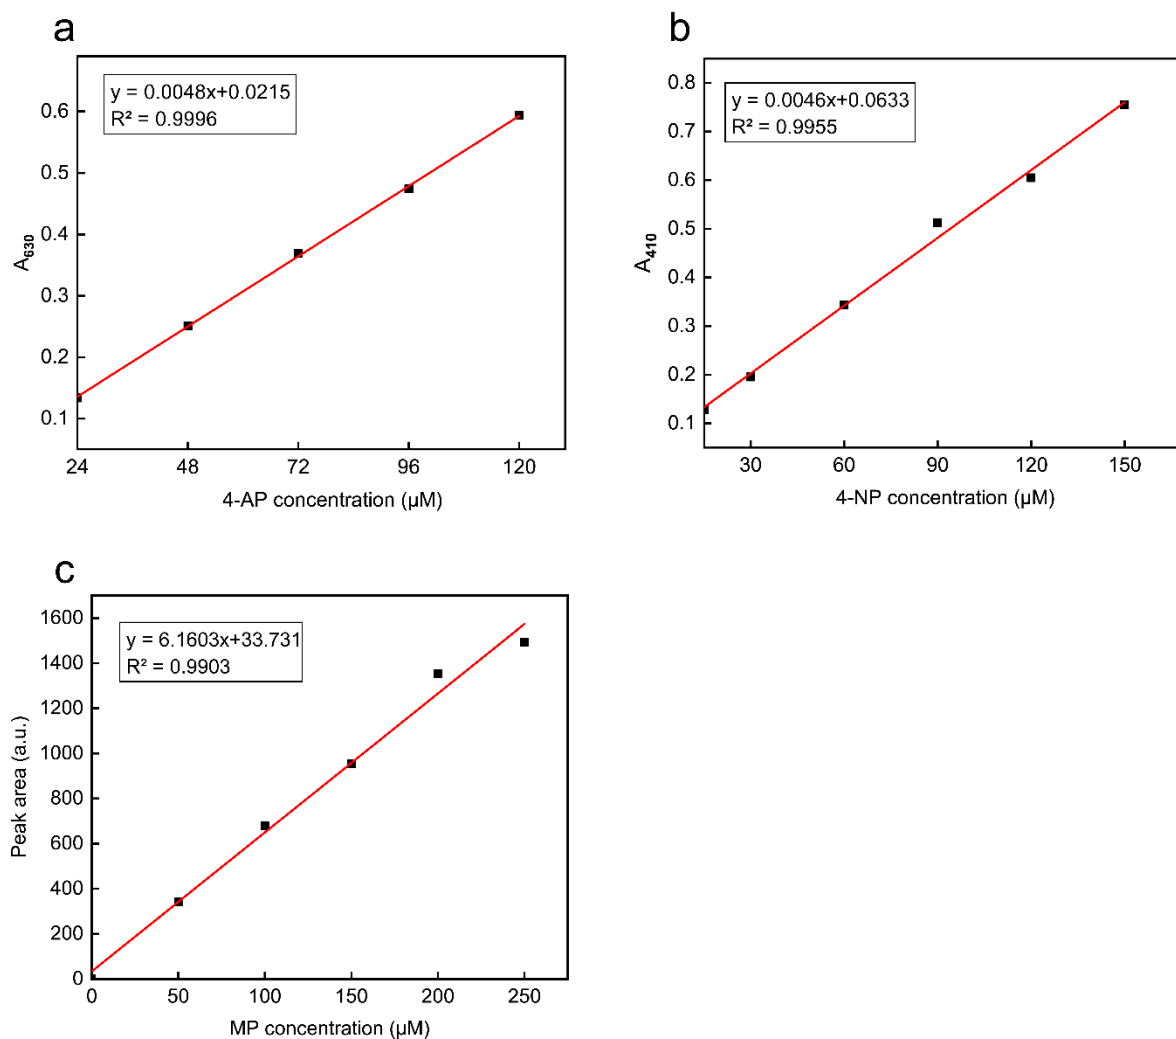

**Fig. S4** The calibration curves of (a) 4-AP, (b) 4-NP and (c) MP. The wavelengths for the spectrophotometry measurement of 4-NP and 4-AP were 410 and 630 nm, respectively. The wavelength for MP detection was 276 nm in the HPLC detection.
